# Supplementary material for: SRPK1 maintains acute myeloid leukemia through effects on isoform usage of epigenetic regulators including BRD4
Source: PubMed Central journal article supplement (PMC6300607; doi:10.1038/s41467-018-07620-0), 2018-12-19
Supplement: 41467_2018_7620_MOESM2_ESM.pdf [file 41467_2018_7620_MOESM2_ESM.pdf]

## Description of Additional Supplementary Files

File Name: Supplementary Data 1

Description: Differential gene expression analysis of THP-1 cells after 24 hours of treatment with 3 $\mu$ M SPHINX31 compared to vehicle treated control

File Name: Supplementary Data 2

Description: Gene Set Enrichment Analysis of significantly downregulated genes after 24 hours treatment of THP-1 cells with 3 $\mu$ M SPHINX31

File Name: Supplementary Data 3

Description: Splice site changes identified in THP-1 cells after transduction with SRPK1 gRNA compared to empty control.

File Name: Supplementary Data 4

Description: Overlap of significant splicing events between genetic and pharmacological inhibition of SRPK1

File Name: Supplementary Data 5

Description: Gene Set Enrichment Analysis of genes with significant splicing modulation after 24 hours treatment of THP-1 cells with 3 $\mu$ M SPHINX31

File Name: Supplementary Data 6

Description: Total and differential peaks identified in THP-1 cells after BRD4S-to BRD4L isoform switching using gRNA compared to empty control

File Name: Supplementary Data 7

Description: Overlapping loci illustrating MLL-AF9 recruitment and BRD4 eviction after BRD4S-to BRD4L isoform switching
